# Supplementary material for: Facile synthesis of manganese oxide/aligned carbon nanotubes over aluminium foil as 3D binder free cathodes for lithium ion batteries
Source: Royal Society of Chemistry journal article supplement (doi:10.1039/c3ta00793f), 2013-01-01
Supplement: c3ta00793f.pdf [file c3ta00793f.pdf]

# Facile Synthesis of Manganese Oxide/Aligned Carbon Nanotubes over Aluminium Foil as 3D Binder Free Cathodes for Lithium Ion Batteries

*Fengliu Lou,<sup>§</sup> Haitao Zhou,<sup>‡</sup> Fan Huang,<sup>§</sup> Fride Vullum-Bruer,<sup>‡</sup> Trung Dung Tran<sup>†</sup>*

*De Chen<sup>§,\*</sup>*

<sup>§</sup>Department of Chemical Engineering, <sup>‡</sup>Department of Materials Science and Engineering,

<sup>†</sup>Department of Physics, Norwegian University of Science and Technology, 7491 Trondheim,

Norway

E-mail: [chen@nt.ntnu.no](mailto:chen@nt.ntnu.no)

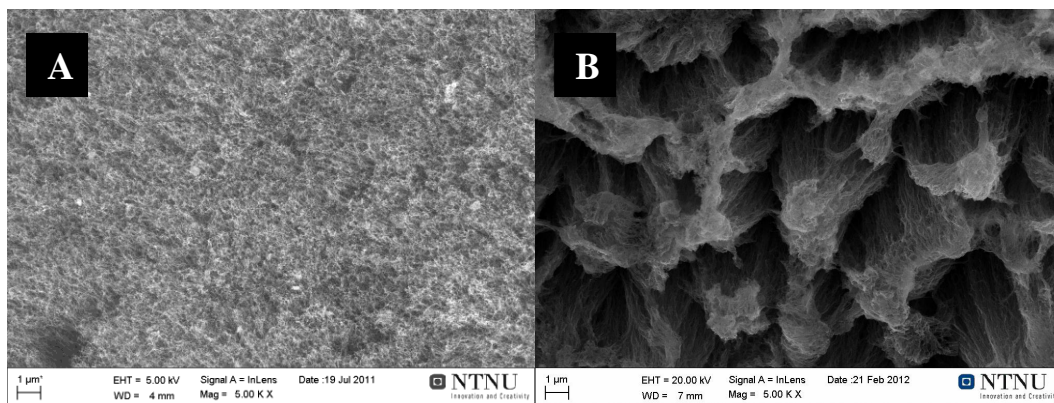

**Figure S1** Top view of ACNT (A) and MCA-3-200 (B).

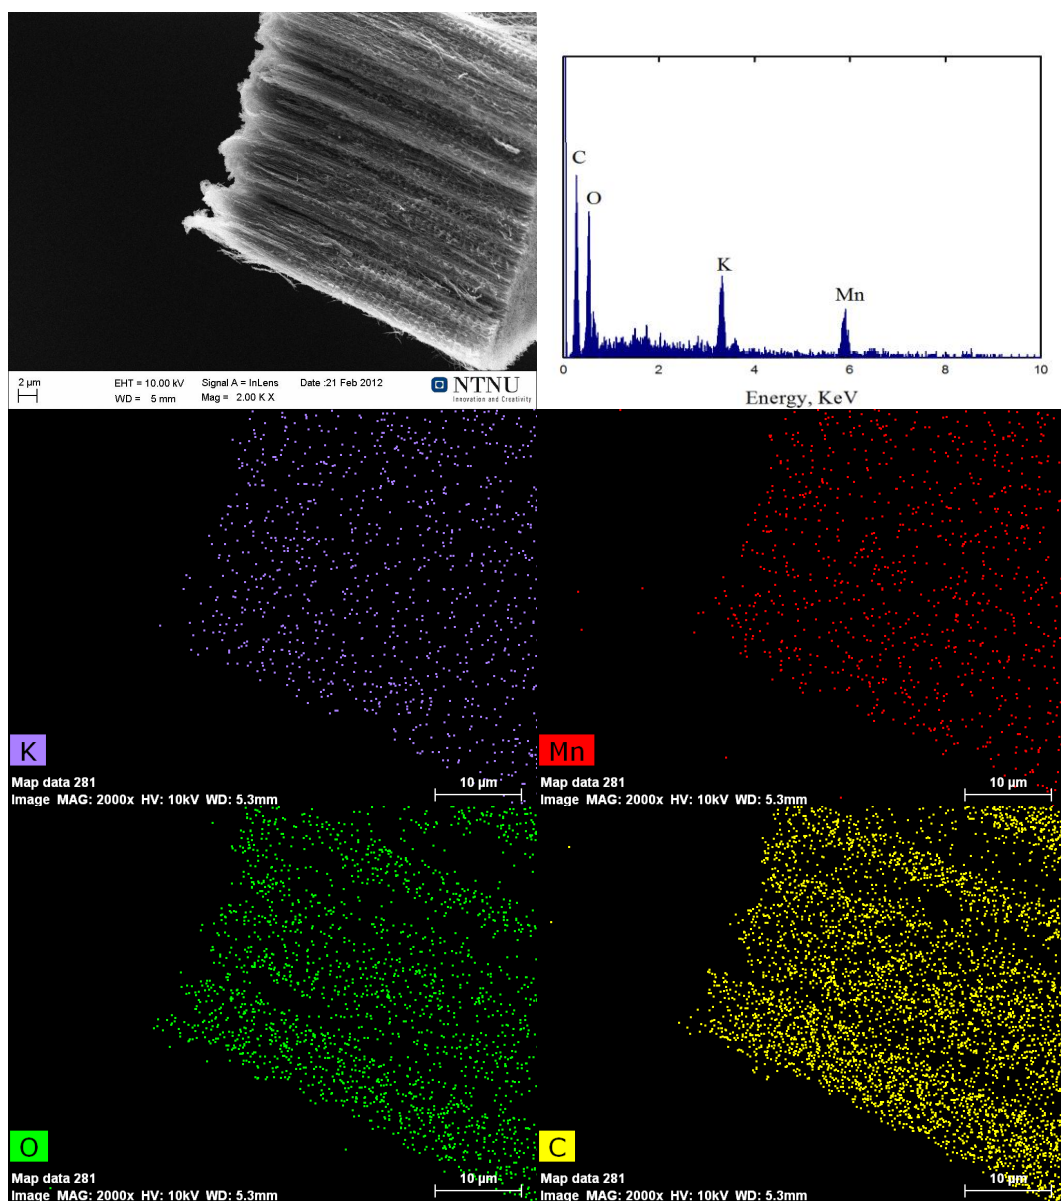

Figure S2 EDS and elemental mapping of MCA-3.

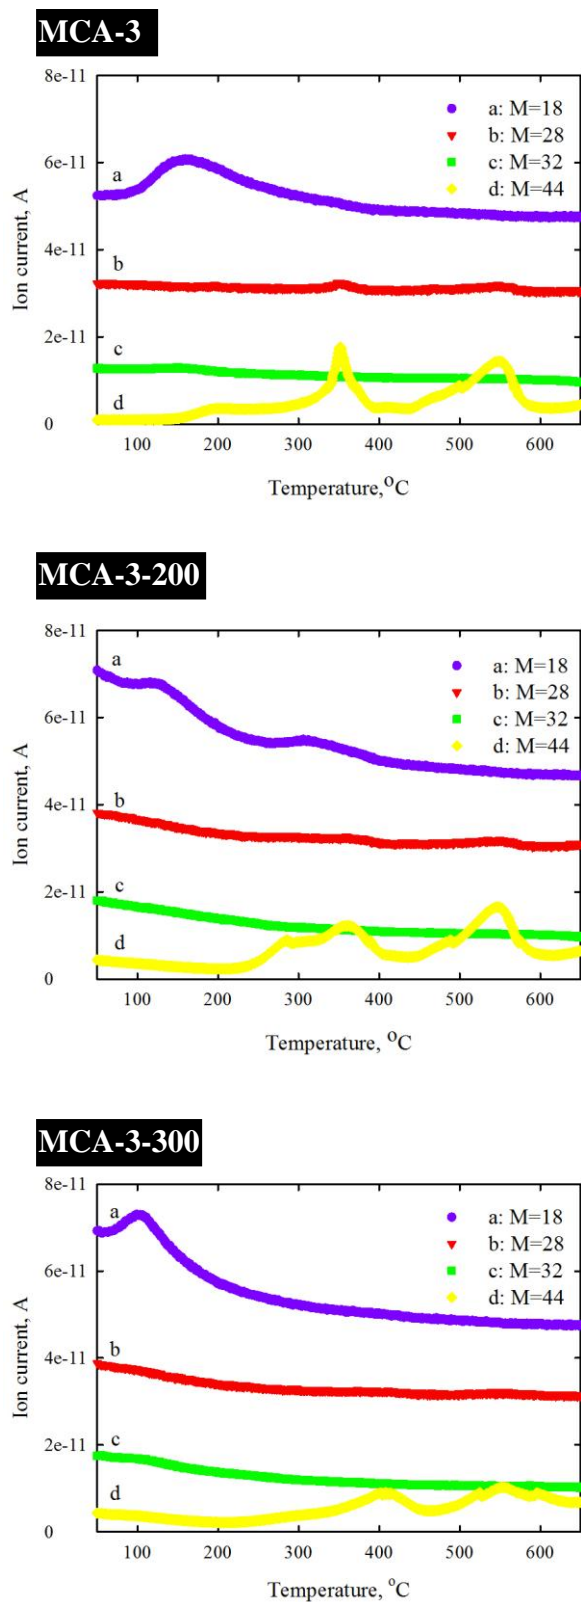

Figure S3 Mass spectra when the samples were analyzed by TG.

**Table S1** Textual properties of the as synthesized nanomaterials.

| Sample    | Surface area, m <sup>2</sup> g <sup>-1</sup> | Pore Volume, cm <sup>3</sup> g <sup>-1</sup> | Average pore size, Å |
|-----------|----------------------------------------------|----------------------------------------------|----------------------|
| ACNT      | 130.2                                        | 0.324                                        | 95.1                 |
| MCA-3     | 85.2                                         | 0.179                                        | 122.3                |
| MCA-3-200 | 52.9                                         | 0.155                                        | 144.1                |
| MCA-3-300 | 44.3                                         | 0.112                                        | 200.5                |

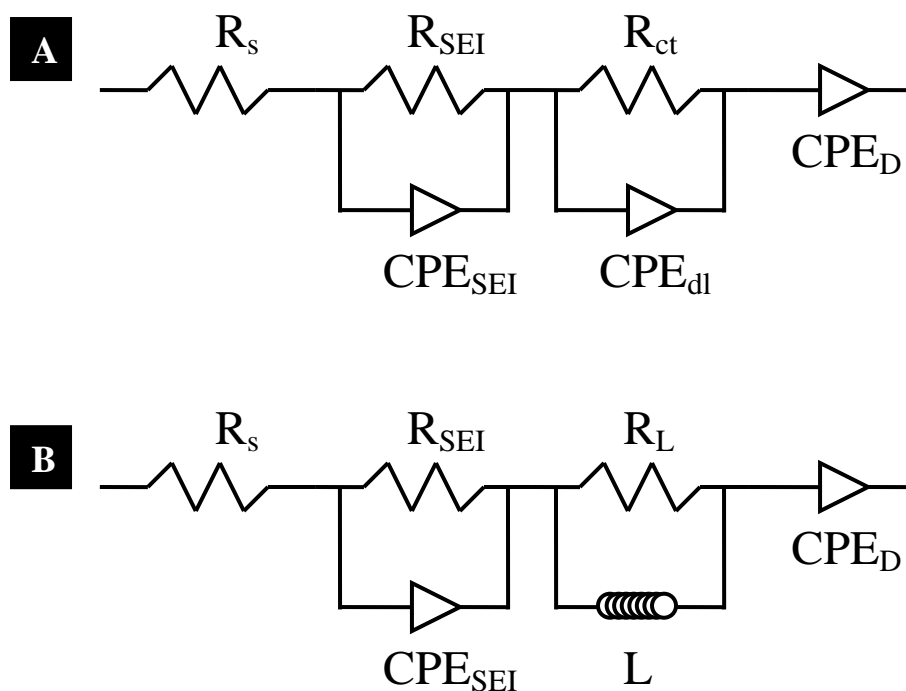

**Figure S4** Equivalent circuit I (A). It consists of ohmic ( $R_s$ ), SEI film ( $R_{SEI}$ ) and charge transfer ( $R_{ct}$ ) resistances, the SEI ( $CPE_{SEI}$ ) and double layer ( $CPE_{dl}$ ) capacitance, along with a diffusion component ( $CPE_D$ ). Equivalent circuit II (B). It consists of ohmic ( $R_s$ ) and SEI film ( $R_{SEI}$ ) resistances, the SEI ( $CPE_{SEI}$ ) capacitance, the parallel inductance ( $L$ ) and resistance ( $R_L$ ) along with a diffusion component ( $CPE_D$ ).

**Table S2** The equivalent circuit parameters obtained from simulation of EIS experimental data of MCA-3 at various DOD by using equivalent circuit I.

| DOD               |          | 10%     | 20%     | 40%     | 60%     |
|-------------------|----------|---------|---------|---------|---------|
| $R_s, \Omega$     |          | 2.7     | 2.5     | 2.6     | 3.1     |
| $CPE_{SEI}^{[a]}$ | $Y_0, F$ | 2.8E-7  | 3.6E-7  | 4.9E-7  | 3.4E-7  |
|                   | $n$      | 0.99    | 0.98    | 0.95    | 1       |
| $R_{SEL}, \Omega$ |          | 3.8     | 4.0     | 4.3     | 3.6     |
| $CPE_{dl}^{[a]}$  | $Y_0, F$ | 0.00027 | 0.00033 | 0.00029 | 0.00022 |
|                   | $n$      | 0.73    | 0.70    | 0.71    | 0.66    |
| $R_{ct}, \Omega$  |          | 4.0     | 4.2     | 7.1     | 19.6    |
| $CPE_D^{[a]}$     | $Y_0, F$ | 0.14    | 0.13    | 0.086   | 0.042   |
|                   | $n$      | 0.81    | 0.81    | 0.79    | 0.75    |

[a]  $Y_0$  and  $n$  were evaluated from the equation  $Z_{CPE} = Y_0^{-1} * (j\omega)^{-n}$ .

**Table S3** The equivalent circuit parameters obtained from simulation of EIS experimental data of MCA-3-200 at various DOD by using equivalent circuit I when DOD is 10% and 20%, and using and equivalent circuit II when DOD is 40% and 60%.

| DOD                       |          | 10%    | 20%    | 40%     | 60%     |
|---------------------------|----------|--------|--------|---------|---------|
| $R_s, \Omega$             |          | 2.7    | 3.0    | 3.0     | 3.0     |
| $CPE_{SEI}^{[a]}$         | $Y_0, F$ | 3.2E-7 | 2.3E-7 | 8.7E-7  | 6.4E-7  |
|                           | n        | 0.88   | 0.90   | 0.79    | 0.82    |
| $R_{SEI}, \Omega$         |          | 10.8   | 10.9   | 18.8    | 16.7    |
| L, H or $CPE_{dl}^{[a]}$  | $Y_0, F$ | 6.8E-5 | 5.5E-5 | 0.00033 | 0.00010 |
|                           | n        |        |        | 0.55    | 0.57    |
| $R_L$ or $R_{ct}, \Omega$ |          | 2.7    | 2.5    | 11.4    | 38.7    |
| $CPE_D^{[a]}$             | $Y_0, F$ | 0.079  | 0.075  | 0.034   | 0.022   |
|                           | n        | 0.73   | 0.73   | 0.64    | 0.55    |

[a]  $Y_0$  and n were evaluated from the equation  $Z_{CPE} = Y_0^{-1} * (j\omega)^{-n}$ .



**Table S4** The equivalent circuit parameters obtained from simulation of EIS experimental data of MCA-3 after various cycles by using equivalent circuit I.

| DOD               |          | 5th     | 20th    | 100th   |
|-------------------|----------|---------|---------|---------|
| $R_s, \Omega$     |          | 2.6     | 2.7     | 3.7     |
| $CPE_{SEI}^{[a]}$ | $Y_0, F$ | 4.9E-7  | 8.1E-7  | 6.4E-7  |
|                   | n        | 0.95    | 0.88    | 0.89    |
| $R_{SEI}, \Omega$ |          | 4.3     | 41.9    | 53.2    |
| $CPE_{dl}^{[a]}$  | $Y_0, F$ | 0.00029 | 0.00042 | 0.00017 |
|                   | n        | 0.71    | 0.95    | 0.66    |
| $R_{ct}, \Omega$  |          | 7.1     | 9.5     | 18.6    |
| $CPE_D^{[a]}$     | $Y_0, F$ | 0.086   | 0.057   | 0.042   |
|                   | n        | 0.79    | 0.70    | 0.74    |

[a]  $Y_0$  and n were evaluated from the equation  $Z_{CPE} = Y_0^{-1} * (j\omega)^{-n}$ .

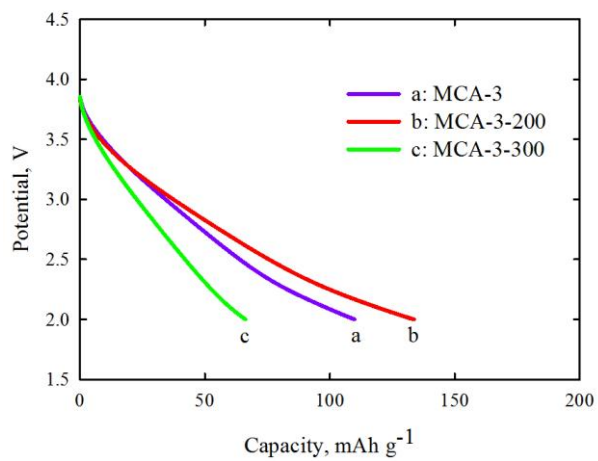

**Figure S5** Discharge profiles of MCA at 1 C after 100 cycles.

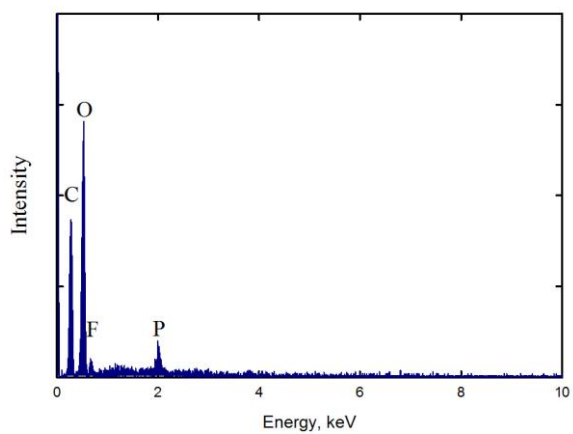

**Figure S6** EDS of lithium foil after 100 cycles.
